# Supplementary material for: Mapping the Future Afforestation Distribution of China Constrained by National Afforestation Plan and Climate Change
Source: Copernicus journal article supplement (doi:10.5194/bg-2023-177), 2023-11-06
Supplement: Supplementary file 1 [file bg-2023-177-supplement.pdf]

# **Mapping the Future Afforestation Distribution of China Constrained by National Afforestation Plan and Climate Change**

Shuaifeng Song<sup>1,2</sup>, Xuezhen Zhang<sup>1,3</sup>, Xiaodong Yan<sup>2</sup>

<sup>1</sup>Key Laboratory of Land Surface Pattern and Simulation, Institute of Geographic Sciences and Natural Resources Research, Chinese Academy of Sciences, Beijing 100101, People's Republic of China.

<sup>2</sup>State Key Laboratory of Earth Surface Processes and Resource Ecology, Faculty of Geographical Science, Beijing Normal University, Beijing 100875, People's Republic of China.

<sup>3</sup>University of Chinese Academy of Sciences, Beijing 100049, People's Republic of China.

*Correspondence to:* Xuezhen Zhang (xzzhang@igsrr.ac.cn) and Xiaodong Yan (yxd@bnu.edu.cn)

## **Contents of this file**

Figures S1 to S4

Tables S1 to S3

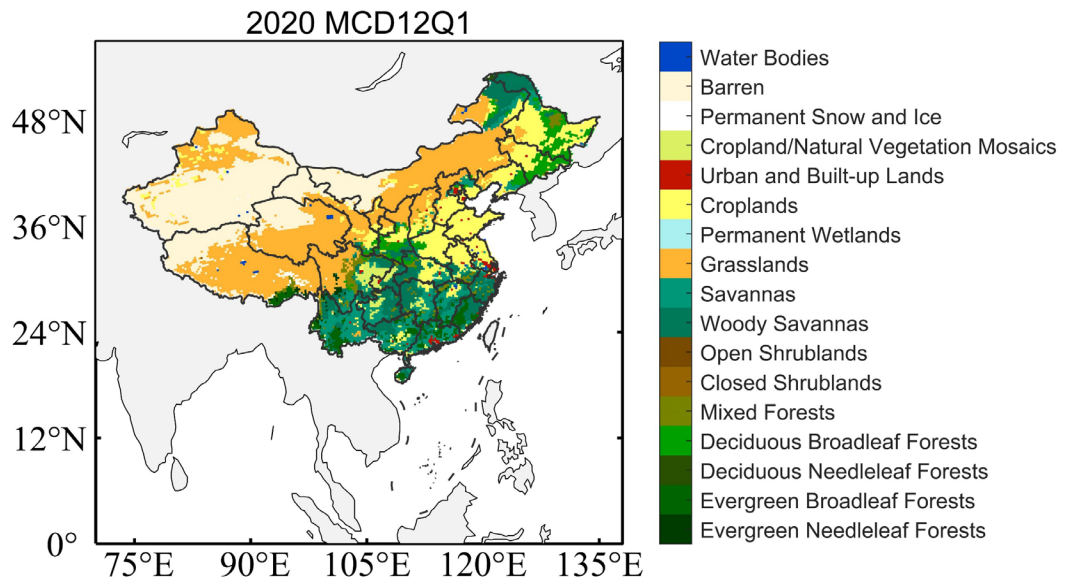

**Figure S1:** Spatial distribution of land use and cover types in 2020 based on the MCD12Q1 data.

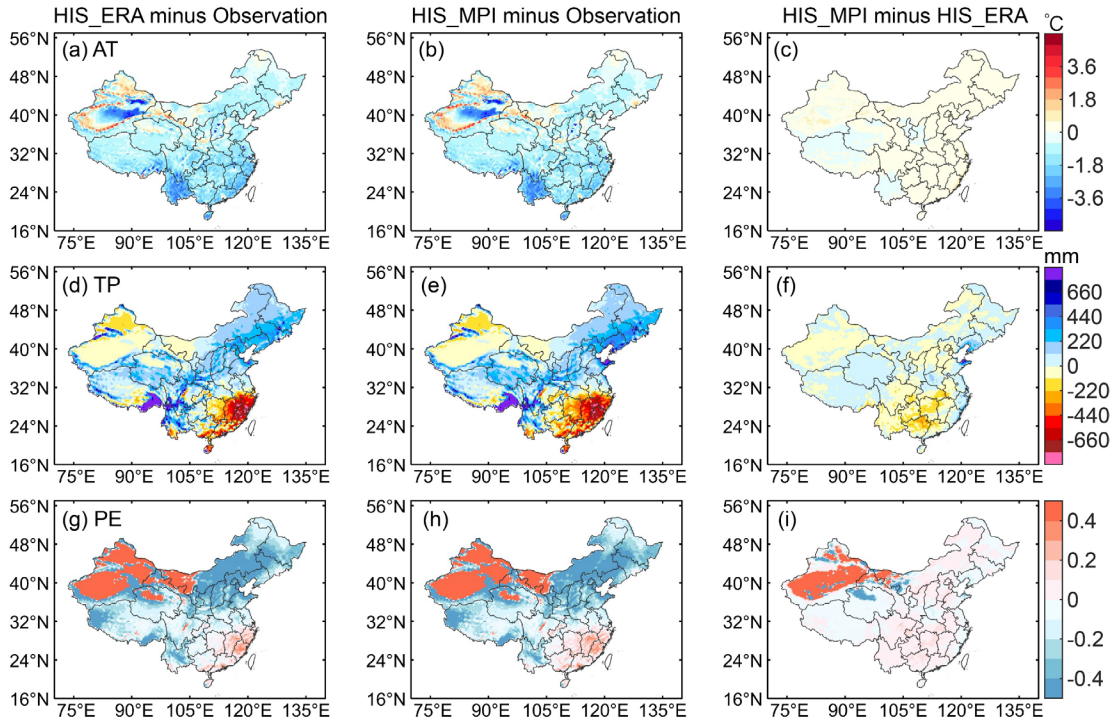

**Figure S2:** Differences between simulated and observed climatological mean of the AT, TP, and PE in China during the historical periods (1995-2014). HIS\_MPI and HIS\_ERA indicate the LBCs driving the WRF model from the MPI model and ERA5.

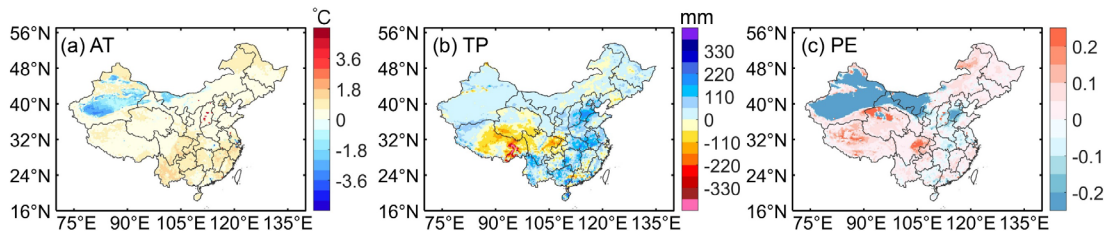

**Figure S3:** Projected changes (FUT\_ MPI versus HIS\_ MPI) in key climate variables (AT, TP, and PE) under SSP2-4.5 comparing to 1995–2014.

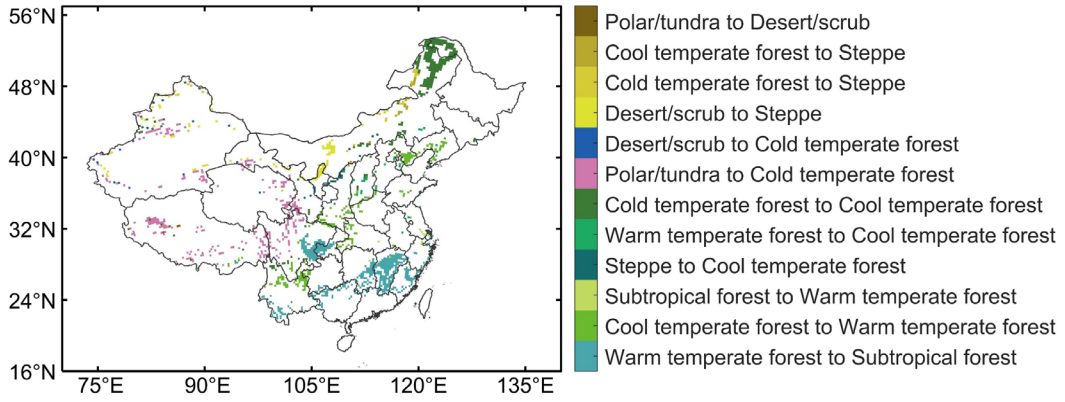

**Figure S4:** Projected changes (FUT\_ MPI versus HIS\_ MPI) in major vegetation types under SSP2-4.5 comparing to 1995–2014. The shifted total areas of vegetation types exceeding 6250 m<sup>2</sup> (10 grids) are exhibited.

**Table S1:** The IGBP classification scheme of MCD12Q1 products

| Name                                | Value | Description                                                                                            |
|-------------------------------------|-------|--------------------------------------------------------------------------------------------------------|
| Evergreen Needleleaf Forests        | 1     | Dominated by evergreen conifer trees (canopy>2m). Tree cover >60%.                                     |
| Evergreen Broadleaf Forests         | 2     | Dominated by evergreen broadleaf and palmate trees (canopy >2m). Tree cover >60%.                      |
| Deciduous Needleleaf Forests        | 3     | Dominated by deciduous needleleaf (larch) trees (canopy >2m). Tree cover >60%.                         |
| Deciduous Broadleaf Forests         | 4     | Dominated by deciduous broadleaf trees (canopy >2m). Tree cover >60%.                                  |
| Mixed Forests                       | 5     | Dominated by neither deciduous nor evergreen (40-60% of each) tree type (canopy >2m). Tree cover >60%. |
| Closed Shrublands                   | 6     | Dominated by woody perennials (1-2m height) >60% cover.                                                |
| Open Shrublands                     | 7     | Dominated by woody perennials (1-2m height) 10-60% cover.                                              |
| Woody Savannas                      | 8     | Tree cover 30-60% (canopy >2m).                                                                        |
| Savannas                            | 9     | Tree cover 10-30% (canopy >2m).                                                                        |
| Grasslands                          | 10    | Dominated by herbaceous annuals (<2m).                                                                 |
| Permanent Wetlands                  | 11    | Permanently inundated lands with 30-60% water cover and >10% vegetated cover.                          |
| Croplands                           | 12    | At least 60% of area is cultivated cropland.                                                           |
| Urban and Built-up Lands            | 13    | At least 30% impervious surface area including building materials, asphalt, and vehicles.              |
| Cropland/Natural Vegetation Mosaics | 14    | Mosaics of small-scale cultivation 40-60% with natural tree, shrub, or herbaceous vegetation.          |
| Permanent Snow and Ice              | 15    | At least 60% of area is covered by snow and ice for at least 10 months of the year.                    |
| Barren                              | 16    | At least 60% of area is non-vegetated barren (sand, rock, soil) areas with less than 10% vegetation.   |
| Water Bodies                        | 17    | At least 60% of area is covered by permanent water bodies.                                             |
| Unclassified                        | 255   | Has not received a map label because of missing inputs.                                                |

**Table S2:** Area of afforestation region of each province in China (unit: 10<sup>4</sup> km<sup>2</sup>)

| Provinces      | Historical open area regions | Projected forest suitable lands | Projected potential afforestation regions constrained by climate change | National planed afforestation (NFMP) | Final future potential afforestation region constrained by climate change and national policy |
|----------------|------------------------------|---------------------------------|-------------------------------------------------------------------------|--------------------------------------|-----------------------------------------------------------------------------------------------|
| Inner Mongolia | 94.68                        | 45.18                           | 38.62                                                                   | 12.23                                | 12.25                                                                                         |
| Shanxi         | 9.00                         | 14.69                           | 9.00                                                                    | 8.99                                 | 9.00                                                                                          |
| Shannxi        | 8.45                         | 17.58                           | 7.58                                                                    | 7.20                                 | 7.20                                                                                          |
| Yunnan         | 21.37                        | 30.07                           | 20.38                                                                   | 6.91                                 | 6.88                                                                                          |
| Gansu          | 31.23                        | 13.50                           | 6.75                                                                    | 5.87                                 | 5.88                                                                                          |
| Sichuan        | 27.06                        | 22.41                           | 8.47                                                                    | 5.66                                 | 5.67                                                                                          |
| Hebei          | 7.70                         | 16.76                           | 7.70                                                                    | 4.17                                 | 4.14                                                                                          |
| Guizhou        | 9.68                         | 12.93                           | 9.68                                                                    | 3.46                                 | 3.44                                                                                          |
| Henan          | 0.71                         | 15.89                           | 0.71                                                                    | 2.34                                 | 2.33                                                                                          |
| Qinghai        | 67.94                        | 3.13                            | 2.88                                                                    | 2.30                                 | 2.31                                                                                          |
| Hunan          | 10.48                        | 16.23                           | 10.48                                                                   | 1.91                                 | 1.92                                                                                          |
| Hubei          | 6.03                         | 14.40                           | 6.03                                                                    | 1.64                                 | 1.63                                                                                          |
| Chongqing      | 2.38                         | 6.63                            | 2.38                                                                    | 1.37                                 | 1.38                                                                                          |
| Heilongjiang   | 6.37                         | 38.17                           | 6.37                                                                    | 1.25                                 | 1.23                                                                                          |
| Liaoning       | 3.24                         | 12.80                           | 3.24                                                                    | 1.11                                 | 1.11                                                                                          |
| Guangxi        | 12.44                        | 19.15                           | 12.44                                                                   | 1.11                                 | 1.11                                                                                          |
| Guangdong      | 8.39                         | 15.39                           | 8.39                                                                    | 1.08                                 | 1.08                                                                                          |
| Anhui          | 2.28                         | 12.65                           | 2.28                                                                    | 0.75                                 | 0.74                                                                                          |
| Jiangxi        | 8.09                         | 13.84                           | 8.09                                                                    | 0.72                                 | 0.72                                                                                          |
| Ningxia        | 3.75                         | 1.38                            | 0.69                                                                    | 0.70                                 | 0.69                                                                                          |
| Tibet          | 110.50                       | 4.63                            | 0.31                                                                    | 0.61                                 | 0.25                                                                                          |
| Fujian         | 3.63                         | 9.19                            | 3.63                                                                    | 0.59                                 | 0.60                                                                                          |
| Jilin          | 1.75                         | 17.31                           | 1.75                                                                    | 0.53                                 | 0.56                                                                                          |
| Zhejiang       | 4.68                         | 6.89                            | 4.68                                                                    | 0.46                                 | 0.48                                                                                          |
| Beijing        | 0.54                         | 1.54                            | 0.54                                                                    | 0.31                                 | 0.30                                                                                          |
| Xinjiang       | 147.81                       | 5.81                            | 5.56                                                                    | 0.21                                 | 0.19                                                                                          |
| Shandong       | 0.06                         | 14.19                           | 0.06                                                                    | 0.11                                 | 0.13                                                                                          |
| Jiangsu        | 0.66                         | 9.41                            | 0.66                                                                    | 0.09                                 | 0.10                                                                                          |
| Hainan         | 1.88                         | 2.69                            | 1.88                                                                    | 0.07                                 | 0.10                                                                                          |
| Tianjin        | 0.06                         | 1.19                            | 0.06                                                                    | 0.03                                 | 0.06                                                                                          |
| Shanghai       | 0.05                         | 0.44                            | 0.05                                                                    | 0.00                                 | 0.05                                                                                          |
| Hong Kong      | \                            | \                               | \                                                                       | \                                    | \                                                                                             |
| Macau          | \                            | \                               | \                                                                       | \                                    | \                                                                                             |
| Taiwan         | \                            | \                               | \                                                                       | \                                    | \                                                                                             |
| Total          | 612.88                       | 416.08                          | 191.33                                                                  | 73.78                                | 73.51                                                                                         |

**Table S3:** The classification scheme of HLZ model in this study

|    | Potential vegetation types   | Reclassifications     | AT (°C) | TP(mm)  | PE   |
|----|------------------------------|-----------------------|---------|---------|------|
| 1  | Polar/Nival area             |                       | 1.1     | 353.6   | 0.2  |
| 2  | Subpolar/Alpine dry tundra   |                       | 2.1     | 88.4    | 1.4  |
| 3  | Subpolar/Alpine moist tundra | Polar/tundra          | 2.1     | 177.8   | 0.7  |
| 4  | Subpolar/Alpine wet tundra   |                       | 2.1     | 353.6   | 0.4  |
| 5  | Subpolar/Alpine rain tundra  |                       | 2.1     | 707.1   | 0.2  |
| 6  | Cold temperate dry scrub     |                       | 4.2     | 177.8   | 1.4  |
| 7  | Cool temperate desert scrub  |                       | 8.5     | 177.8   | 2.8  |
| 8  | Warm temperate desert scrub  | Desert/scrub          | 14.3    | 177.8   | 5.7  |
| 9  | Subtropical desert scrub     |                       | 20.2    | 177.8   | 5.7  |
| 10 | Tropical desert scrub        |                       | 33.9    | 177.8   | 11.3 |
| 11 | Desert                       |                       | 33.9    | 88.4    | 22.6 |
| 12 | Cool temperate steppe        | Steppe                | 8.5     | 353.6   | 1.4  |
| 13 | Warm temperate thorn steppe  |                       | 14.3    | 353.6   | 2.8  |
| 14 | Cold temperate moist forest  |                       | 4.2     | 353.6   | 0.7  |
| 15 | Cold temperate wet forest    | Cold temperate forest | 4.2     | 707.2   | 0.4  |
| 16 | Cold temperate rain forest   |                       | 4.2     | 1414.2  | 0.2  |
| 17 | Cool temperate moist forest  |                       | 8.5     | 707.1   | 0.7  |
| 18 | Cool temperate wet forest    | Cool temperate forest | 8.5     | 1414.2  | 0.4  |
| 19 | Cool temperate rain forest   |                       | 8.5     | 2828.4  | 0.2  |
| 20 | Warm temperate dry forest    |                       | 14.3    | 707.1   | 1.4  |
| 21 | Warm temperate moist forest  | Warm temperate forest | 14.3    | 1414.2  | 0.7  |
| 22 | Warm temperate wet forest    |                       | 14.3    | 2828.4  | 0.4  |
| 23 | Subtropical thorn woodland   |                       | 20.2    | 353.6   | 2.8  |
| 24 | Subtropical dry forest       |                       | 20.2    | 707.1   | 1.4  |
| 25 | Subtropical moist forest     | Subtropical forest    | 20.2    | 1414.2  | 0.7  |
| 26 | Subtropical wet forest       |                       | 20.2    | 2828.4  | 0.4  |
| 27 | Subtropical rain forest      |                       | 20.2    | 5656.9  | 0.2  |
| 28 | Tropical thorn woodland      |                       | 33.9    | 353.6   | 5.7  |
| 29 | Tropical very dry forest     |                       | 33.9    | 707.1   | 2.8  |
| 30 | Tropical dry forest          | Tropical forest       | 33.9    | 1414.2  | 1.4  |
| 31 | Tropical moist forest        |                       | 33.9    | 2828.4  | 0.7  |
| 32 | Tropical wet forest          |                       | 33.9    | 5656.9  | 0.4  |
| 33 | Tropical rain forest         |                       | 33.9    | 11313.7 | 0.2  |
